# Supplementary material for: Crítica de la política en occidente
Source: Royal Society of Chemistry journal article supplement (doi:10.1039/c9nr00918c), 1992-01-01
Supplement: c9nr00918c1.pdf [file c9nr00918c1.pdf]

**MSOT/CT/MR imaging Guided and hypoxia Maneuvered Oxygen  
self-sufficiency radiotherapy based on One-pot MnO<sub>2</sub>-mSiO<sub>2</sub> @ Au  
nanoparticle**

**Supporting Information**

Siyu Wang<sup>1</sup>, Qing You<sup>1</sup>, Jinping Wang<sup>1</sup>, Yilin Song<sup>1</sup>, Yu Cheng<sup>1</sup>, Yidan Wang<sup>1</sup>, Shan Yang<sup>1</sup>,

Lifang Yang<sup>1</sup>, Peishan Li<sup>1</sup>, Qianglan Lu<sup>1</sup>, Meng Yu<sup>\*\*2</sup>, Nan Li<sup>\*1</sup>

(1 Tianjin Key Laboratory of Drug Delivery & High-Efficiency, School of Pharmaceutical  
Science and Technology, Tianjin University, 300072, Tianjin, PR China.)

(2 Guangdong Provincial Key Laboratory of new Drug Screening, School of Pharmaceutical  
Science, Southern Medical University, 510515, Guangzhou, PR China.)

\*(Li N.) Corresponding author at: School of Pharmaceutical Science and Technology, Tianjin  
University, 300072, Tianjin, PR China.

E-mail address: linan19850115@163.com

\*(Yu M.) Corresponding author at: School of Pharmaceutical Science, Southern Medical University,  
510515, Guangzhou, PR China.

E-mail address: meng4716@126.com

## Content

Figure S1 Elements analysis and TEM images of MNH<sub>s</sub>

Figure S2 Surface area distribution and multi-point BET plot.

Figure S3 Cumulative surface area and cumulative pore volume distribution.

Figure S4. <sup>1</sup>H-NMR spectrum of hyaluronic acid, dopamine and HA-DN complex.

Figure S5. Oxygen generation capability.

Figure S6. Photoacoustic imaging for tumor oxygen generation.

Figure S7. CT imaging for formulation distribution in major organs.

Figure S8 Pharmacokinetic profiles and biodistribution.

Figure S9 T<sub>2</sub>-weighted MR images of MnO<sub>2</sub>-mSiO<sub>2</sub>@Au-HA

Figure S10 CT phantom images of Iohexol and MAHNPs

Introduction of photothermal conversion calculation

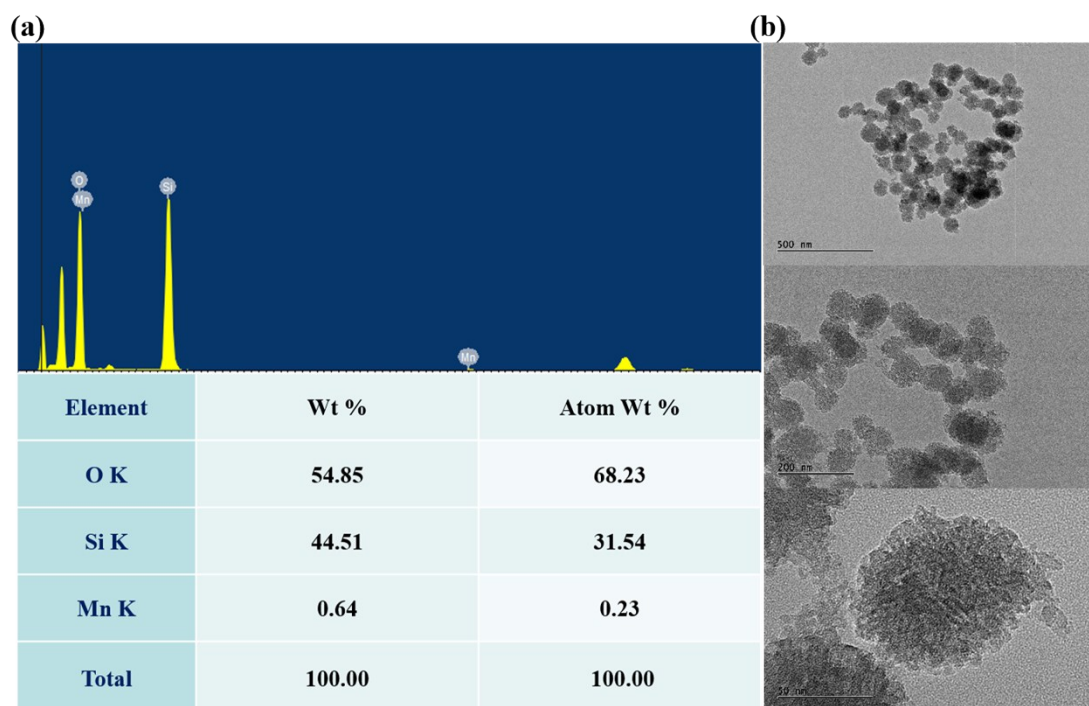

Figure. S1 (a). Elements analysis of  $MNH_s$ . (b). TEM images of  $MNH_s$  scale bar from up to down are 500 nm, 200nm and 20 nm. Table1. The element types O, Si, Mn and the atom weight respectively.

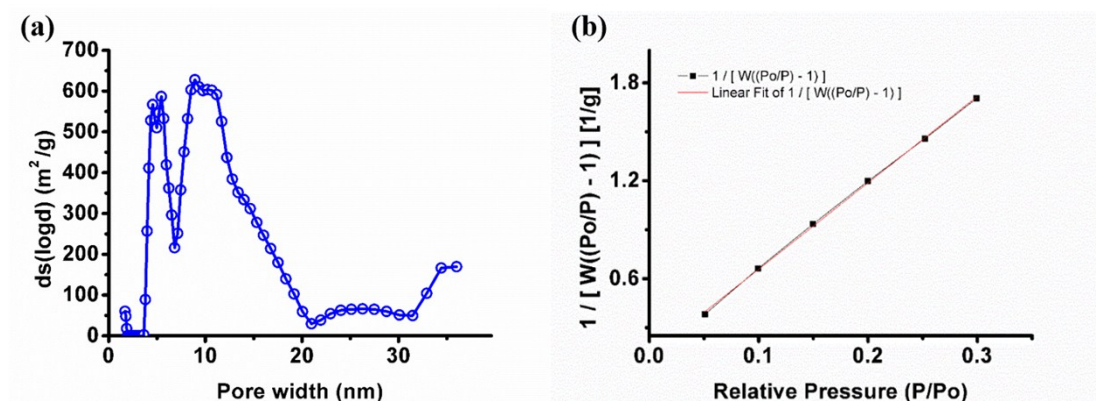

| BET Summary                |               |
|----------------------------|---------------|
| Slope                      | 5.294 1/g     |
| Intercept                  | 1.289e-01 1/g |
| Correlation coefficient, R | 0.999715      |
| C constant                 | 42.056        |
| Surface Area               | 642.182 m²/g  |

Figure. S2 (a). Surface area distributed by different pore width of MnO<sub>2</sub>-mSiO<sub>2</sub> nanohybrids. (b). Multi-point BET plot of MnO<sub>2</sub>-mSiO<sub>2</sub> nanohybrids. Table.2. BET data summary.

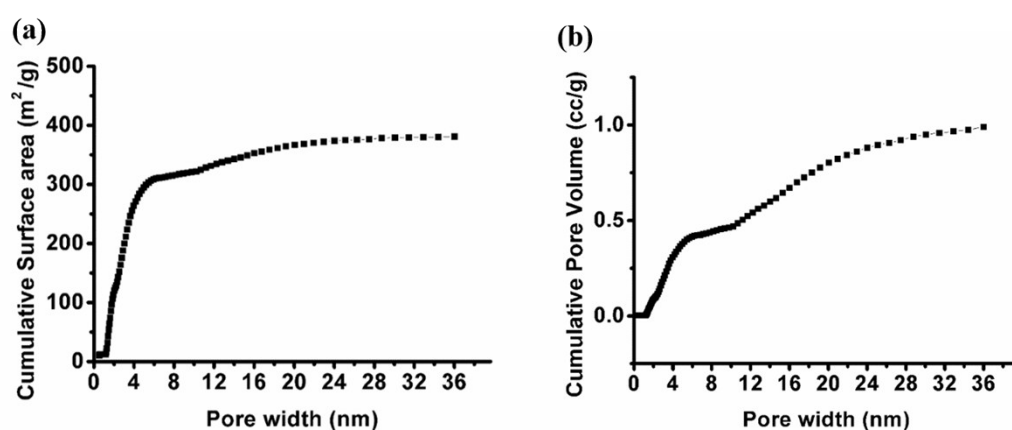

| DFT method Summary      |                           |
|-------------------------|---------------------------|
| Pore volume             | 0.989 cc/g                |
| Surface area            | 381.083 m <sup>2</sup> /g |
| Lower confidence limit  | 0.524 nm                  |
| Pore width (Mode(dLog)) | 16.015 nm                 |

Figure. S3 (a). Cumulative surface area of MnO<sub>2</sub>-SiO<sub>2</sub> nanohybrids. (b) Cumulative pore volume distributed by different pore width of MnO<sub>2</sub>-SiO<sub>2</sub> nanohybrids. Table3. DFT method Summary.

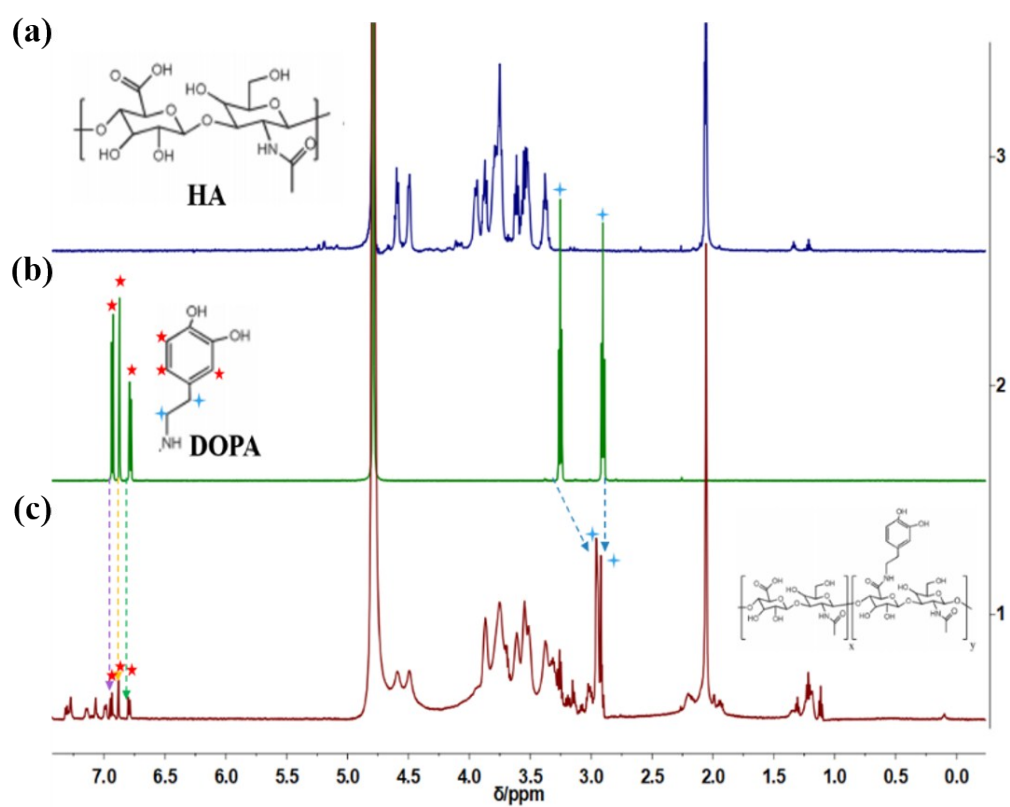

Figure. S4 (a).  $^1\text{H}$ -NMR spectrum of the unmodified hyaluronic acid (b)  $^1\text{H}$ -NMR spectrum of dopamine (c).  $^1\text{H}$ -NMR spectrum of HA-DN complex.

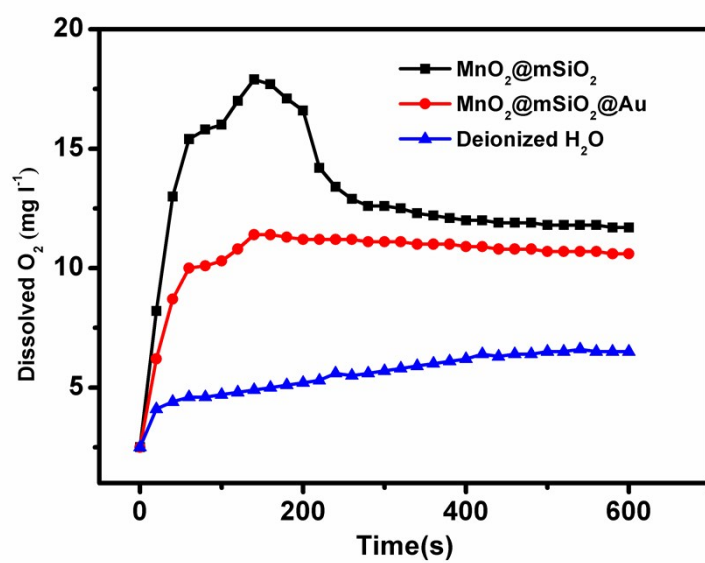

Figure. S5 Oxygen generation capability of different formulations.

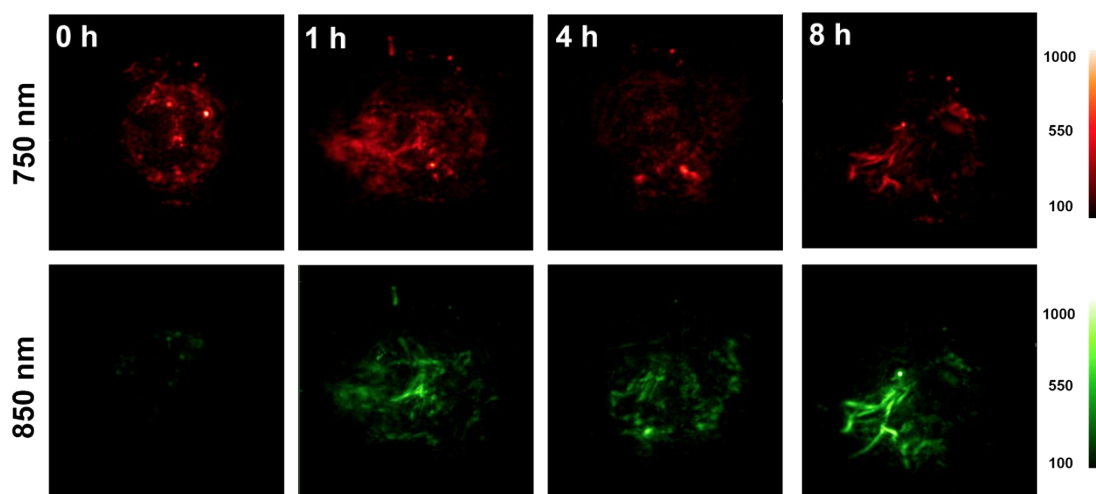

Figure. S6 Photoacoustic imaging for tumor oxygen generation

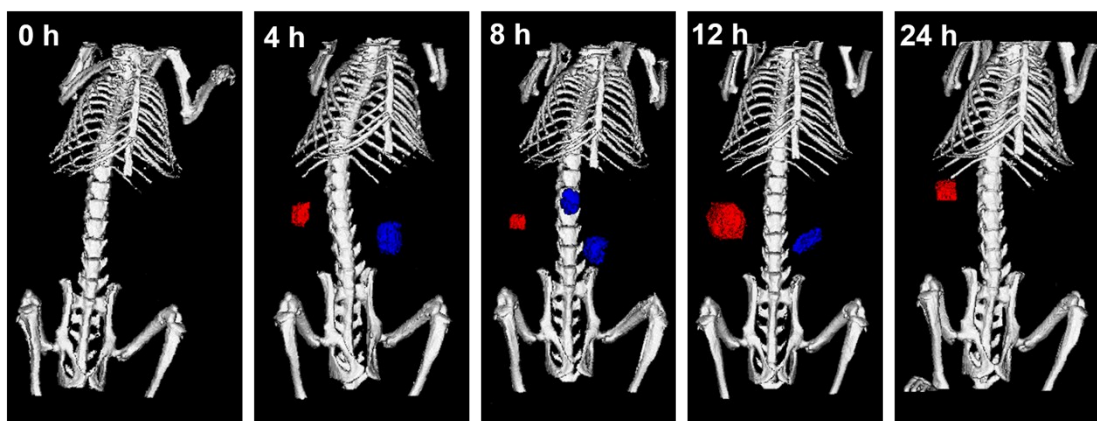

Figure. S7. CT imaging for formulation distribution in major organs after 24 h injection. The circled sections represent the tumor sites.

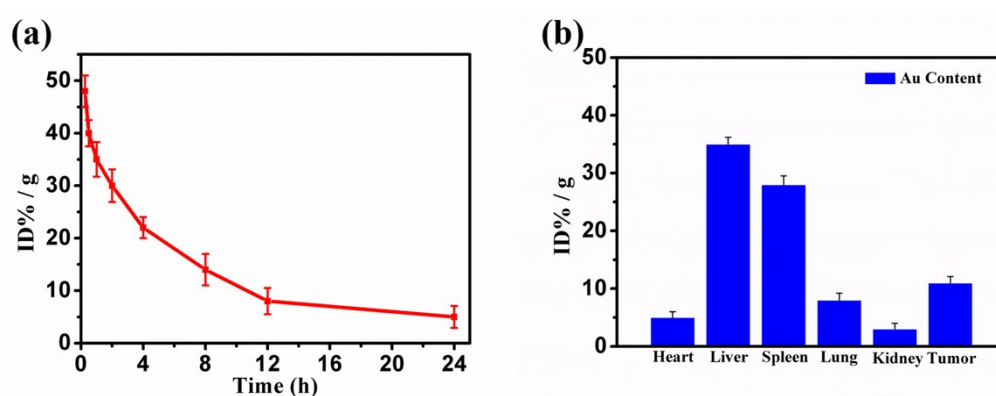

Figure. S8 (a). Pharmacokinetic profiles of  $\text{MnO}_2\text{-mSiO}_2\text{@Au-HA}$  nanoparticles following intravenous administration by measuring Au concentrations. (b). Biodistribution in major organs after intravenously injection of  $\text{MnO}_2\text{-mSiO}_2\text{@Au-HA}$  nanoparticles.

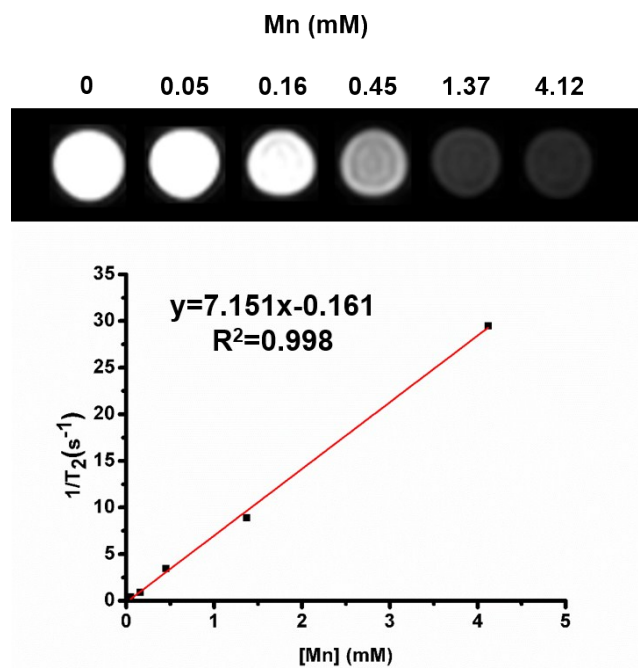

Figure S9. T<sub>2</sub>-weighted MR images of MnO<sub>2</sub>-mSiO<sub>2</sub>@Au-HA at varying Mn<sup>2+</sup> concentrations. Lower is the linear relationship between the T<sub>2</sub> relaxation rate (1/T<sub>2</sub>) and Mn<sup>2+</sup> concentrations in MnO<sub>2</sub>-mSiO<sub>2</sub>@Au-HA aqueous solutions.

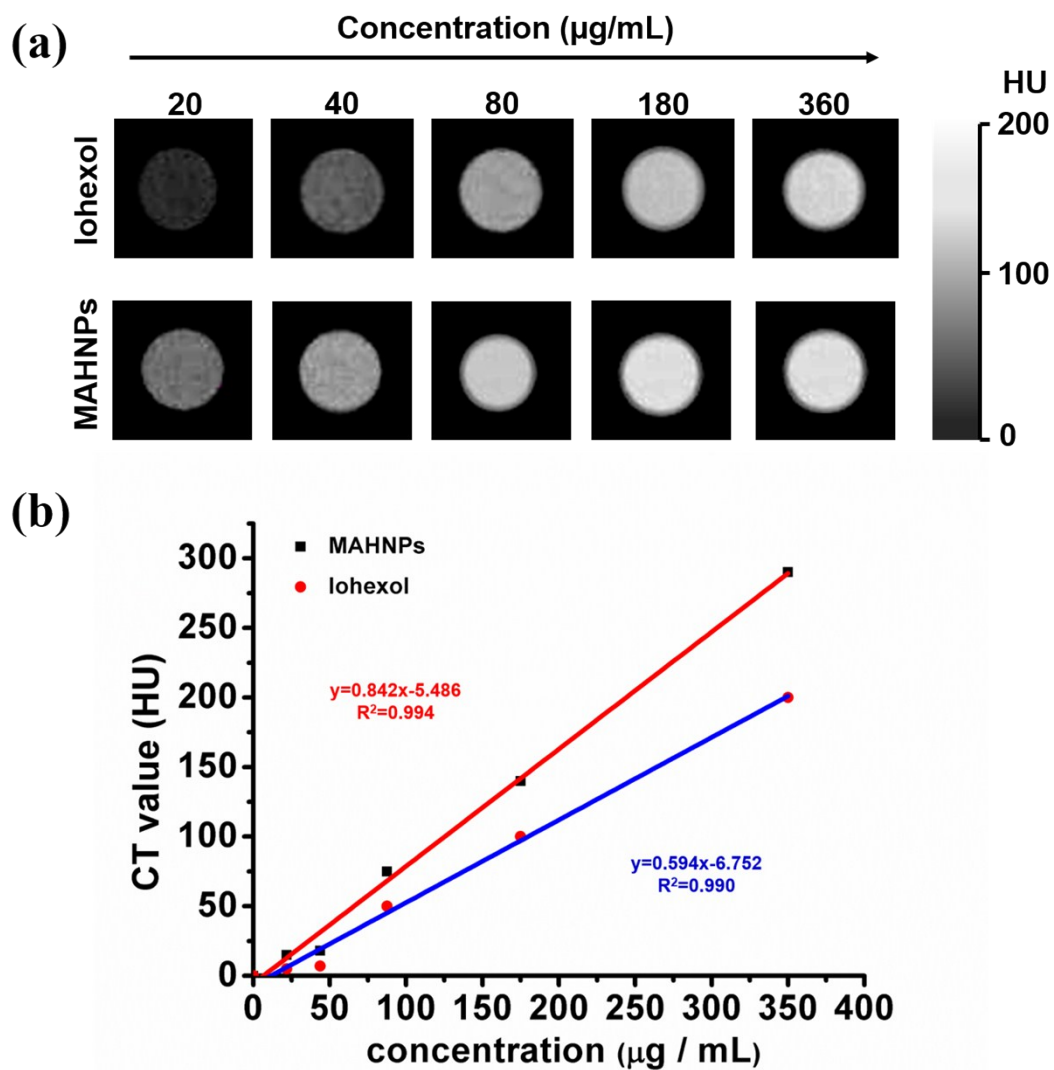

Figure. S10 (a). CT phantom images of Iohexol (upper panel) and MAHNPs (lower panel) at different I or Au concentrations. (b). CT values of MAHNPs and Iohexol with different Au or I concentrations.

The Calculation of the photothermal conversion efficiency was determined by the following steps according to the references[1-3].

Firstly, the aqueous solution of the MnO<sub>2</sub>-mSiO<sub>2</sub>@Au-HA nanoparticles (100 ppm) underwent continuous irradiation of 808 nm laser (1.5 W/cm<sup>2</sup>) until steady state temperature was reached. Then the laser was shut off, and the aqueous solution was naturally cooled to environment temperature. The temperature change of the aqueous solution was recorded (Figure. 2g). The  $\eta$  value was calculated as follows:

$$\eta = \frac{hs(T_{Max} - T_{Surr}) - Q_s}{I(1 - 10^{-A_{808}})} \quad (1)$$

Where h is the heat transfer coefficient, S is the surface area of the container, and the value of  $hs$  is obtained from the Eq. (4) and Figure 2h. The maximum steady temperature ( $T_{max}$ ) was 63.1 °C and environmental temperature ( $T_{Surr}$ ) was 25.9 °C. The laser power  $I$  used in irradiation was 1.5 W/cm<sup>2</sup>. The absorbance of the MnO<sub>2</sub>-mSiO<sub>2</sub>@Au-HA nanoparticles at 808 nm was 0.534.  $Q_{Dis}$  is heat dissipated from the light absorbed by the solvent and container. A dimensionless parameter  $\theta$  is calculated as followed:

$$\theta = \frac{T - T_{Surr}}{T_{Max} - T_{Surr}} \quad (2)$$

A sample system time constant  $\tau_s$  can be calculated as Eq. (3)

$$t = -\tau_s \ln(\theta) \quad (3)$$

According to figure 2g,  $\tau_s$  was obtained to be 166.97 s.

$$hs = \frac{m_D C_D}{\tau_s} \quad (4)$$

In addition,  $m_D$  is 0.5 g and  $C_D$  is 4.2 J/g·°C in the experiment.

$Q_s$  is heat dissipated from the light absorbed by the container itself, and it was determined independently to be 3.5 mW using a container containing pure water. Thus, substituting according values of each parameters to Eq. 1, the 808 nm laser photothermal conversion efficiency ( $\eta$ ) of the  $\text{MnO}_2\text{-mSiO}_2\text{@Au-HA}$  nanoparticles can be calculated to be 25.38%.

- [1] J. Xiao, S. Fan, F. Wang, L. Sun, X. Zheng, C. Yan, *Nanoscale* 2014, **6**, 4345-4351.
- [2] X. Liu, B. Li, F. Fu, K. Xu, R. Zou, Q. Wang, B. Zhang, Z. Chen, J. Hu, *Dalton Trans.*, 2014, **43**, 11709-11715.
- [3] B. Li, Q. Wang, R. Zou, X. Liu, K. Xu, W. Li, J. Hu, *Nanoscale*, 2014, **6**, 3274-3282.
